# Supplementary material for: Supramolecular multilayer structures of wired redox enzyme electrodes
Source: Royal Society of Chemistry journal article supplement (doi:10.1039/b500528k), 2005-01-01
Supplement: b500528k.pdf [file b500528k.pdf]

**Supporting Information**

---

**Supramolecular Multilayer Structures of Wired Redox Enzyme Electrodes**

---

Ernesto J. Calvo<sup>\*a</sup>, Claudia B. Danilowicz<sup>b</sup> and Alejandro Wolosiuk<sup>c</sup>

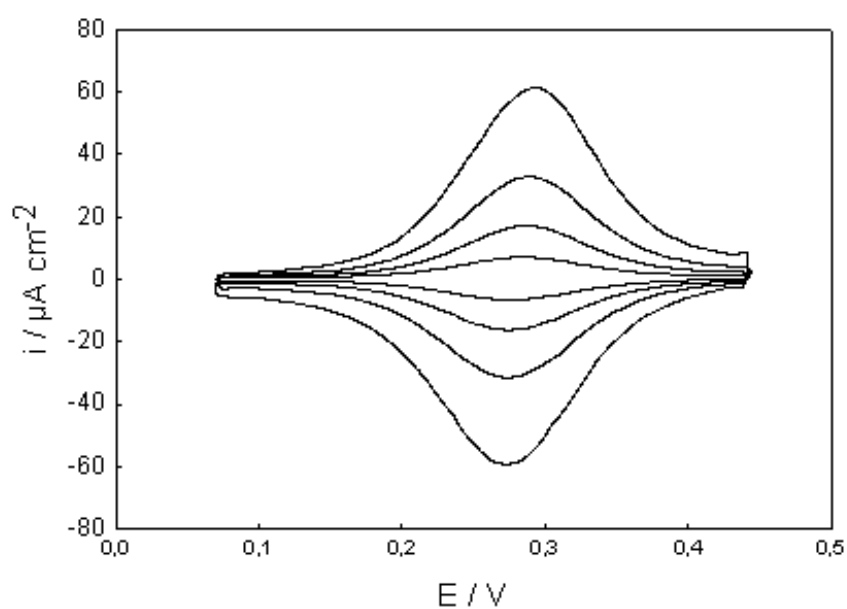

**Fig. 1** Cyclic voltammetry of (PAH-Os)<sub>10</sub>(GOx)<sub>10</sub> in 0.1 M Tris buffer of pH 7.5 and 0.2 M KNO<sub>3</sub>. Scan rates: 0.05, 0.1, 0.2 and 0.4 V s<sup>-1</sup>

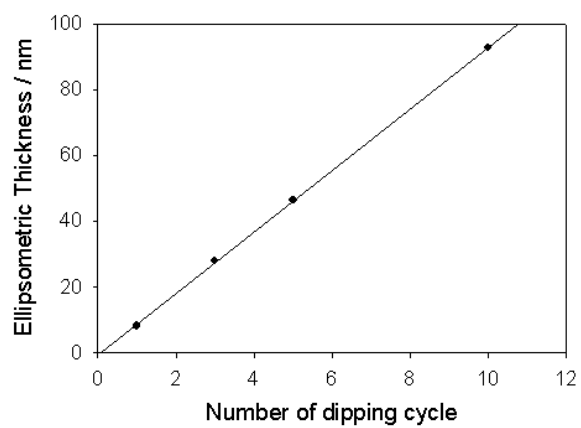

**Fig. 2** Ellipsometric thickness of self-assembled lbl (PAH-Os)<sub>n</sub>(GOx)<sub>n</sub>.

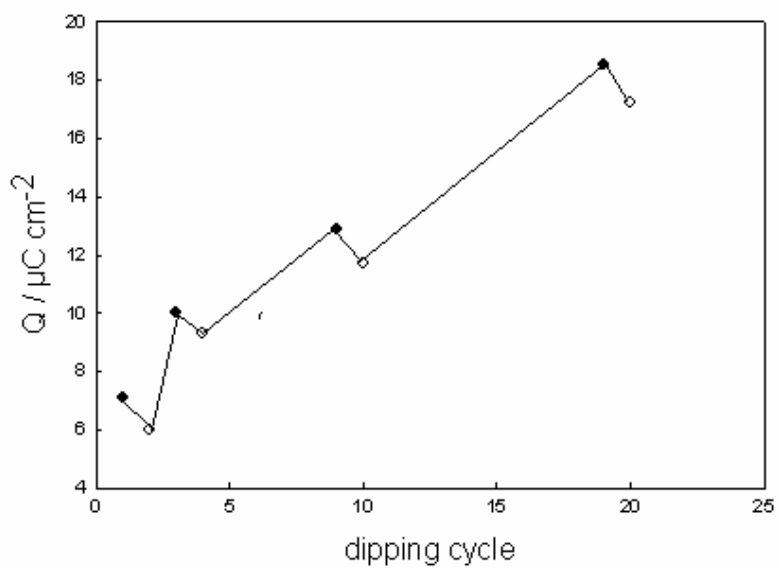

**Fig. 3** Redox charge as a function of dipping cycles. Filled symbols correspond to PAH-Os terminated layers while open symbols refer to GOx as the topmost layer.

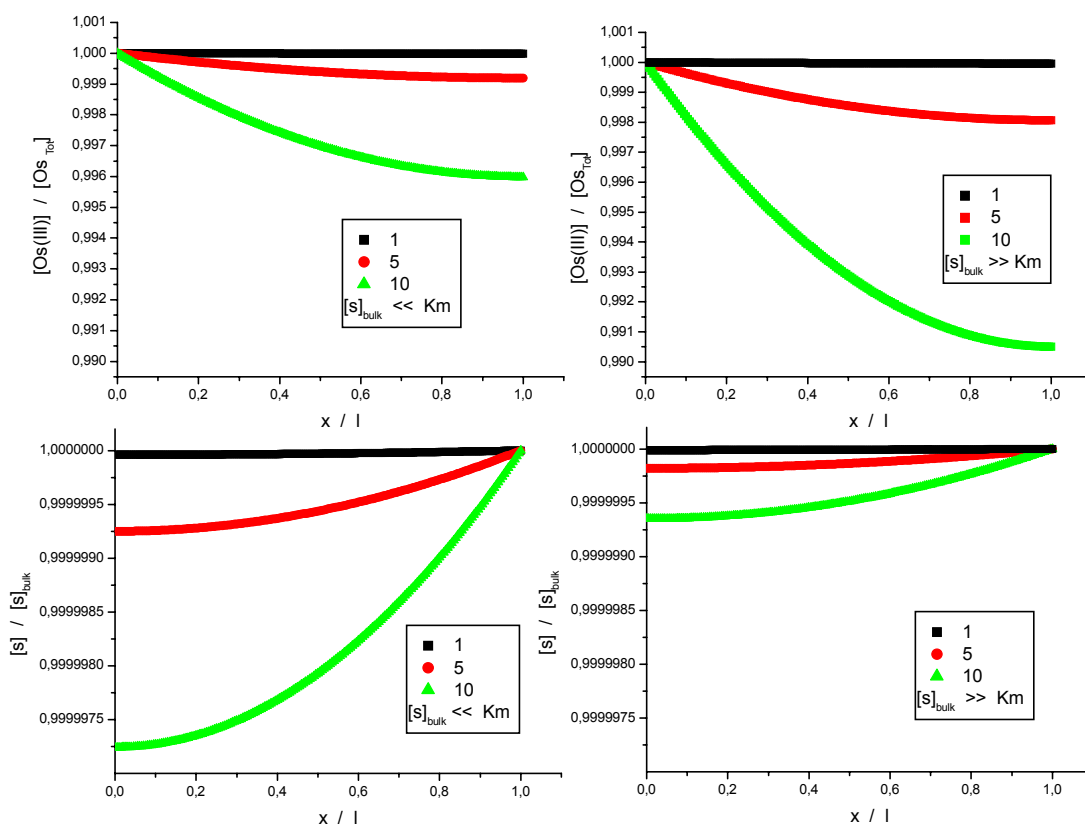

**Fig. 4** Simulated normalized concentration profiles for glucose and Os(III) in (PAH-Os)<sub>n</sub>(Gox)<sub>m</sub> LbL self-assembled multilayers as a function of the films thickness for the conditions described in the text.
